# Supplementary material for: The Berkeley Environmental Air-quality and CO 2 Network: field calibrations of sensor temperature dependence and assessment of network scale CO 2 accuracy
Source: Copernicus journal article supplement (doi:10.5194/amt-14-5487-2021), 2021-08-12
Supplement: Supplementary file 1 [file amt-14-5487-2021-supplement.zip]

Archive with 3 entries (3 files):
- amt-14-5487-2021-supplement-title-page.pdf
- temp_slope_bay_2020.xlsx
- editted_Part2.pdf
