# Supplementary material for: The Berkeley Environmental Air-quality and CO 2 Network: field calibrations of sensor temperature dependence and assessment of network scale CO 2 accuracy
Source: Copernicus journal article supplement (doi:10.5194/amt-14-5487-2021), 2021-08-12
Supplement: Supplementary file 1 [file amt-14-5487-2021-supplement.zip › amt-14-5487-2021-supplement-title-page.pdf]

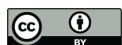

*Supplement of*

**The Berkeley Environmental Air-quality and CO<sub>2</sub> Network: field calibrations of sensor temperature dependence and assessment of network scale CO<sub>2</sub> accuracy**

**Erin R. Delaria et al.**

*Correspondence to:* Ronald C. Cohen ([rccohen@berkeley.edu](mailto:rccohen@berkeley.edu))

- [amt-14-5487-2021-supplement-title-page.pdf](#)
- [editted\\_Part2.pdf](#)
- [temp\\_slope\\_bay\\_2020.xlsx](#)

The copyright of individual parts of the supplement might differ from the article licence.
